# Supplementary material for: A Sustainability-Based Risk Assessment for P3 Projects Using a Simulation Approach
Source: MDPI journal article supplement (doi:10.3390/su14010344), 2021-12-29
Supplement: s1 [file s1]

**Table S2.** Description of shortlisted risks

| <b>Code</b> | <b>Shortlisted Risk Factor</b>                                              | <b>Description</b>                                                                                                                                                                                                                                                                 |
|-------------|-----------------------------------------------------------------------------|------------------------------------------------------------------------------------------------------------------------------------------------------------------------------------------------------------------------------------------------------------------------------------|
| R1          | Interest rate volatility                                                    | The risk occurring if the lenders fail to provide a fixed interest rate on project finance debt.                                                                                                                                                                                   |
| R2          | Foreign exchange risk                                                       | Where the exchange rate between the currency of revenue and the currency of debt diverge, the cost of debt can increase.                                                                                                                                                           |
| R3          | Fluctuating inflation                                                       | When the real inflation rate is different from the predicted inflation rate.                                                                                                                                                                                                       |
| R4          | Demand risk                                                                 | When the service demand does not match the expected level.                                                                                                                                                                                                                         |
| R5          | Credit risk                                                                 | Government agency using the service provided by the project may be unable to afford to perform its obligations under the terms of the PPP agreement, particularly the obligation to pay on a timely basis.                                                                         |
| R6          | Land use & acquisition / resettlement & rehabilitation risk                 | Delay in land acquisition, and economic or physical dislocation resulting from a development project.                                                                                                                                                                              |
| R7          | Legislative & regulatory restrictions                                       | The host country might have in place trade restrictions, import/export restrictions, and restriction on the term of key management personnel.                                                                                                                                      |
| R8          | Inadequate legal and regulatory framework                                   | Unprecedented changes in laws or regulations made by government/regulatory body.                                                                                                                                                                                                   |
| R9          | Design risk                                                                 | Potential negative effects of the project resulting from incompleteness or flaws in design.                                                                                                                                                                                        |
| R10         | Completion risk                                                             | Risk due to delay in project completion.                                                                                                                                                                                                                                           |
| R11         | Excessive contract variation                                                | Alteration to the scope of works in a construction contract in the form of an addition, substitution or omission from the original scope of works.                                                                                                                                 |
| R12         | Operation and maintenance risk                                              | When the operation and maintenance cost is higher than budget, the performance is under standard or the service cannot be delivered.                                                                                                                                               |
| R13         | Low residual value                                                          | This is the risk that facility conditions are worse than anticipated at the end of the project.                                                                                                                                                                                    |
| R14         | Force Majeure                                                               | Possibility of unforeseen events of physical and/or political nature to disrupt the operation of the project.                                                                                                                                                                      |
| R15         | Public opposition to the project                                            | Resistance from local interest groups due to social impact of project.                                                                                                                                                                                                             |
| R16         | Corruption                                                                  | Lack of respect for law, high cost of coordination with local government, red tapes, nepotism, bribery.                                                                                                                                                                            |
| R17         | Inadequate distribution of authority responsibility and risk in partnership | Bargaining power of either party, or conflicting financial and social goals of the stakeholders may result in this risk. The private investors prioritize the projects based on their greater revenue potential whereas the government's focus is on the social welfare of public. |
| R18         | Environmental degradation                                                   | Potential threat or adverse effects on environment arising out of an organization's activities.                                                                                                                                                                                    |
| R19         | Lack of support from government                                             | Government support is often uncertain creating default risk in a volatile political environment.                                                                                                                                                                                   |
| R20         | Availability of resources (Labor, material & finance)                       | The potential for a failure of project management to result in losses in perspective of market variations.                                                                                                                                                                         |
