# Supplementary material for: A Sustainability-Based Risk Assessment for P3 Projects Using a Simulation Approach
Source: MDPI journal article supplement (doi:10.3390/su14010344), 2021-12-29
Supplement: s1 [file s1]

**Table S1. Literature Review Synthesis for Shortlisting Risk Factors**

**Qualitative Scoring Scale:** L=Low, M=Medium, H=High, where Low=1, Medium=3 and High=5

| Reference No.                                | 1        | 2                            | 3       | 4                 | 5               | 6                  | 7     | 8                 | 9        | 10    | 11    | 12         | 13                | 14       | 15            | 16                 | 17         | 18                    | 19             | 20                | 21        | 22       | 23               | 24         | 25          | 26       | 27                | 28       | 29             | 30               | 31           | 32                  | 33                     | 34                | 35        | 36               | 37         | 38    | 39             | 40          | 41            | 42                  | 43         | 44             |           |                   |   |   |      |                            |      |                  |  |  |
|----------------------------------------------|----------|------------------------------|---------|-------------------|-----------------|--------------------|-------|-------------------|----------|-------|-------|------------|-------------------|----------|---------------|--------------------|------------|-----------------------|----------------|-------------------|-----------|----------|------------------|------------|-------------|----------|-------------------|----------|----------------|------------------|--------------|---------------------|------------------------|-------------------|-----------|------------------|------------|-------|----------------|-------------|---------------|---------------------|------------|----------------|-----------|-------------------|---|---|------|----------------------------|------|------------------|--|--|
| Year of Publication                          | 2000     | 2002                         | 2002    | 2002              | 2002            | 2003               | 2004  | 2004              | 2004     | 2004  | 2005  | 2005       | 2005              | 2005     | 2006          | 2006               | 2006       | 2006                  | 2007           | 2007              | 2008      | 2008     | 2008             | 2008       | 2009        | 2010     | 2010              | 2011     | 2011           | 2011             | 2011         | 2011                | 2012                   | 2014              | 2014      | 2014             | 2015       | 2015  | 2015           | 2016        | 2016          | 2016                | 2017       | 2017           |           |                   |   |   |      |                            |      |                  |  |  |
| Risk Factors                                 | Ozdoganm | Ahwireng-Obeng and Mokgohlwa | Scharle | Grimsey and Lewis | Zayed and Chang | Akelere and gidado | Hodge | Ahadzi and Bowles | Li et al | Aspin | Zhang | Bing et al | Kumaraswamy et al | Akintoye | Ibrahim et al | Singh & Kalindindi | Shen et al | Abednego and Ogunlana | Ng & Loosemore | Mubin and Ghaffar | Zou et al | Ke et al | Smith and Gannon | Yuan et al | Yelin et al | Ke et al | Wibowo & Mohammad | Li & Zou | Marques & Berg | Iyer and Sagheer | Xiao & Zhang | Nur Alkaf Abd Karim | Heravi and Hajihosseni | Alasad and Motawa | Liu et al | Carbonara et al. | Hu and Zhu | Huang | Rai and Pratap | colin et al | Rouhani et al | Opawole and Jagboro | Chen et al | Shrestha et al | Frequency | Qualitative Score |   |   |      | Assigned Qualitative Score |      | Literature Score |  |  |
| Influential economic events                  |          |                              |         |                   |                 |                    |       |                   | H        |       |       |            |                   |          |               |                    |            | H                     |                |                   |           |          |                  |            |             |          |                   |          |                |                  |              |                     |                        |                   |           |                  |            |       | H              | 44          | H             | M                   | L          |                |           |                   |   |   |      |                            |      |                  |  |  |
| Foreign exchange risk                        |          |                              |         |                   | M               | H                  |       |                   |          |       |       |            |                   |          | M             |                    |            |                       | M              |                   | M         |          |                  |            | M           | M        | M                 | H        |                | H                |              |                     |                        |                   |           |                  |            |       |                | M           |               | H                   | 3          | 3              | 0         | 0                 | H | 5 | 0.07 |                            |      |                  |  |  |
| Poor financial market                        |          |                              |         |                   |                 |                    |       |                   |          |       |       | H          |                   | M        | H             |                    |            |                       |                |                   |           |          |                  |            |             | M        |                   |          |                |                  | M            | M                   |                        |                   |           |                  |            |       |                |             |               |                     | M          | 14             | 4         | 10                | 0 | M | 3    | 0.19                       |      |                  |  |  |
| Interest rate volatility                     |          |                              |         | H                 |                 |                    |       |                   |          |       |       | H          |                   | H        | H             | M                  |            |                       |                |                   |           |          |                  |            | M           | M        | M                 |          |                |                  |              |                     | H                      | M                 |           |                  | H          |       |                | M           |               | M                   | 7          | 2              | 5         | 0                 | M | 3 | 0.10 |                            |      |                  |  |  |
| Fluctuating inflation                        |          |                              |         |                   |                 |                    |       |                   |          |       |       | H          |                   | H        | H             |                    |            |                       | M              |                   | M         |          |                  |            | H           | M        | M                 |          | M              | M                |              |                     | H                      | M                 |           | H                |            |       |                | H           |               | H                   | 15         | 6              | 9         | 0                 | M | 3 | 0.20 |                            |      |                  |  |  |
| Demand risk/Project usage risk               |          |                              |         | H                 | M               | M                  | H     |                   | M        | M     |       | H          |                   | H        | H             |                    |            | H                     | M              |                   | M         |          |                  |            | M           | M        | H                 |          | H              | M                |              |                     | H                      |                   | H         |                  |            |       |                |             | H             |                     | H          | 16             | 8         | 8                 | 0 | H | 5    | 0.36                       |      |                  |  |  |
| Financial attraction of project to investors |          | M                            |         |                   |                 |                    |       |                   |          |       | H     | H          |                   | H        | H             |                    | M          |                       |                |                   |           |          |                  |            | M           |          | H                 |          | M              |                  |              |                     |                        |                   |           |                  |            |       |                |             |               |                     |            | 22             | 1<br>2    | 10                | 0 | H | 5    | 0.50                       |      |                  |  |  |
| Financing strategy used by the project       |          |                              |         |                   |                 |                    |       |                   |          |       |       |            |                   |          |               |                    |            | M                     |                |                   |           |          |                  |            |             |          |                   |          |                |                  |              |                     |                        |                   |           |                  |            |       |                |             |               |                     | 10         | 5              | 5         | 0                 | H | 5 | 0.23 |                            |      |                  |  |  |
| Debt servicing risk                          |          |                              |         |                   |                 |                    |       |                   |          |       |       |            |                   |          | M             |                    |            |                       |                |                   |           |          |                  |            |             |          |                   |          |                |                  |              |                     |                        |                   |           |                  |            |       |                |             |               |                     |            |                | 1         | 0                 | 1 | 0 | M    | 3                          | 0.01 |                  |  |  |
| Lack of creditworthiness/<br>Credit risk     |          |                              |         | M                 | H               |                    |       |                   | M        |       | H     |            |                   |          | H             |                    |            | M                     |                |                   |           |          |                  |            |             | H        |                   |          |                |                  |              | H                   |                        | M                 |           | M                |            |       |                |             |               |                     |            |                | 1         | 0                 | 1 | 0 | M    | 3                          | 0.01 |                  |  |  |
| Delay in financial closure                   |          |                              |         |                   |                 |                    |       |                   |          |       | H     |            |                   |          |               | M                  |            |                       |                |                   |           |          |                  |            |             |          |                   |          |                |                  |              |                     |                        |                   |           | M                |            |       |                |             |               |                     |            |                |           | 11                | 5 | 6 | 0    | M                          | 3    | 0.15             |  |  |
| High finance cost/<br>Financial deficit      |          |                              |         | H                 |                 |                    |       |                   | M        |       | M     | M          |                   |          | M             |                    |            | H                     |                |                   |           |          |                  |            |             |          |                   |          |                |                  |              | H                   |                        |                   |           |                  |            |       |                |             |               |                     |            |                | 3         | 1                 | 2 | 0 | M    | 3                          | 0.04 |                  |  |  |
| Competing alternate infrastructure           |          |                              |         |                   |                 |                    |       |                   |          |       |       |            |                   |          | H             |                    |            | M                     |                |                   |           |          |                  |            |             | M        |                   |          |                |                  |              | M                   |                        |                   | H         |                  |            |       |                |             |               |                     |            |                |           | 8                 | 3 | 4 | 1    | M                          | 3    | 0.11             |  |  |

|                                                                             |  |  |  |   |   |   |   |   |   |   |   |   |   |   |   |   |   |   |   |   |   |   |   |   |   |   |   |   |   |   |   |   |  |   |   |   |   |   |   |   |   |   |      |      |      |    |   |    |      |      |      |      |      |      |      |      |      |
|-----------------------------------------------------------------------------|--|--|--|---|---|---|---|---|---|---|---|---|---|---|---|---|---|---|---|---|---|---|---|---|---|---|---|---|---|---|---|---|--|---|---|---|---|---|---|---|---|---|------|------|------|----|---|----|------|------|------|------|------|------|------|------|------|
| Return on investment risk                                                   |  |  |  |   |   |   | M |   |   |   |   |   |   |   |   |   |   |   |   |   | H |   | M |   |   |   |   |   |   |   |   |   |  | M |   | H | 5 | 2 | 3 | 0 | M | 3 | 0.07 |      |      |    |   |    |      |      |      |      |      |      |      |      |      |
| Uninsurable loss or damage to the assets                                    |  |  |  |   |   | M |   |   |   |   |   |   |   |   |   |   |   |   |   |   |   |   |   |   |   |   |   |   |   |   |   |   |  |   |   |   |   | 6 | 3 | 3 | 0 | H | 5    | 0.14 |      |    |   |    |      |      |      |      |      |      |      |      |      |
| Change in government officials                                              |  |  |  |   |   |   |   |   |   |   |   |   |   |   | H |   |   | H |   |   |   |   |   |   |   |   |   |   |   |   |   |   |  |   |   |   |   | 1 | 0 | 1 | 0 | M | 3    | 0.01 |      |    |   |    |      |      |      |      |      |      |      |      |      |
| Inadequate legal and regulatory framework                                   |  |  |  |   |   |   | M |   |   | M |   |   | M | M |   | M | M |   | M | H |   |   | M | M | L |   | M | M |   |   |   |   |  |   |   |   |   |   | 3 | 3 | 0 | 0 | H    | 5    | 0.07 |    |   |    |      |      |      |      |      |      |      |      |      |
| Legislative & regulatory changes/ restrictions                              |  |  |  |   |   | M |   | L |   | H | M |   | M | M | M | L | M | M |   |   |   | M | L | M | M |   | M | M |   | H | H |   |  |   | M | H | M | L |   |   |   |   | 15   | 3    | 11   | 1  | M | 3  | 0.20 |      |      |      |      |      |      |      |      |
| Unstable political environment                                              |  |  |  |   |   | M |   | M |   | M | M | M | H | M |   |   |   |   |   |   |   |   | L |   | M | M |   |   | H | M |   |   |  |   |   |   |   |   |   |   |   |   | 21   | 4    | 13   | 4  | M | 3  | 0.29 |      |      |      |      |      |      |      |      |
| Expropriation/national ization of assets                                    |  |  |  |   |   |   | L |   |   | M |   | M | M |   |   |   | H |   |   |   |   |   | M | M | M |   | M | M |   |   |   |   |  |   |   |   |   |   |   |   |   |   |      | 13   | 3    | 9  | 1 | M  | 3    | 0.18 |      |      |      |      |      |      |      |
| Lack of support from government                                             |  |  |  | M |   |   |   | H |   | M |   |   | M | M |   |   | M |   |   | H |   |   |   | H | L |   |   | M |   |   | M | M |  |   | M |   |   |   |   |   |   |   |      |      | 11   | 1  | 8 | 2  | M    | 3    | 0.15 |      |      |      |      |      |      |
| Permitting risk                                                             |  |  |  |   |   |   | M |   |   |   |   | H | M |   | M |   | M |   |   |   |   | M |   | M |   |   | M | M |   | M | M | M |  |   |   |   |   |   |   |   |   |   |      |      | 14   | 4  | 9 | 1  | M    | 3    | 0.19 |      |      |      |      |      |      |
| Planning deficiency                                                         |  |  |  |   |   |   |   |   |   |   |   |   |   |   |   |   |   |   |   |   |   |   | M |   |   |   |   |   |   |   |   |   |  |   |   |   |   |   |   |   |   |   |      |      |      | 13 | 1 | 12 | 0    | M    | 3    | 0.18 |      |      |      |      |      |
| Availability of resources ( Labor, material & finance)                      |  |  |  |   |   | M |   |   |   | M | H |   | M | L |   |   | M | M |   |   |   |   | M | M | M | M |   | L |   |   | M |   |  |   |   |   |   |   |   |   |   |   |      |      | 2    | 1  | 1 | 0  | H    | 5    | 0.05 |      |      |      |      |      |      |
| Poor feasibility study                                                      |  |  |  |   |   | M |   |   |   |   |   |   |   |   |   |   | H |   |   |   |   |   |   |   |   | M |   |   |   |   |   |   |  |   |   |   |   |   |   |   |   |   |      |      |      | 14 | 1 | 11 | 2    | M    | 3    | 0.19 |      |      |      |      |      |
| High bidding cost                                                           |  |  |  |   |   |   |   |   |   | H |   |   |   | M |   |   |   |   |   |   |   |   |   |   |   |   |   |   |   |   |   |   |  |   |   |   |   |   |   |   |   |   |      |      |      | 5  | 3 | 2  | 0    | H    | 5    | 0.11 |      |      |      |      |      |
| Competition risk                                                            |  |  |  |   |   |   |   |   |   |   |   |   | M |   |   |   |   |   |   |   |   |   |   |   |   |   |   |   |   |   |   |   |  |   |   |   |   |   |   |   |   |   |      |      |      |    |   | 4  | 2    | 1    | 0    | H    | 5    | 0.09 |      |      |      |
| Conflict of corporate and social goals of the project                       |  |  |  |   |   |   | H |   |   |   |   | H |   |   |   |   |   |   |   | H |   |   |   |   |   |   |   |   |   |   |   |   |  |   |   |   |   |   |   |   |   |   |      |      |      |    | 1 | 0  | 1    | 0    | M    | 3    | 0.01 |      |      |      |      |
| Uncompetitive tender                                                        |  |  |  |   |   |   |   |   |   | M |   |   |   |   |   |   |   |   |   |   |   |   | M | M |   |   |   |   |   |   |   |   |  |   |   |   |   |   |   |   |   |   |      |      |      | 8  | 7 | 1  | 0    | H    | 5    | 0.18 |      |      |      |      |      |
| Inadequate distribution of authority responsibility and risk in partnership |  |  |  |   |   |   |   | M |   |   | M |   |   |   |   |   | H |   |   |   | H |   |   |   | M |   |   | H |   |   |   |   |  |   |   |   |   |   |   |   |   |   |      |      |      |    |   |    | 4    | 1    | 3    | 0    | M    | 3    | 0.05 |      |      |
| Complicated negotiation process                                             |  |  |  |   |   | M |   |   | H |   |   |   |   | M |   | M | H |   |   |   |   |   |   |   |   |   | M | H |   | M |   | M |  |   |   |   |   |   |   |   |   |   |      |      |      |    |   |    | 9    | 6    | 3    | 0    | H    | 5    | 0.20 |      |      |
| Design flaws                                                                |  |  |  |   | M | M |   |   | M | H | M |   | H | M | H | M | M |   |   |   |   | M |   |   |   |   | H | M | M | M | M | H |  |   |   |   |   |   |   |   |   |   |      |      |      |    |   |    |      |      | 10   | 3    | 7    | 0    | M    | 3    | 0.14 |
| Technology risk                                                             |  |  |  |   |   |   | M | M |   |   |   |   |   |   |   |   |   |   |   |   |   |   |   |   |   | H |   |   |   |   |   |   |  |   |   |   |   |   |   |   |   |   |      |      |      |    |   |    |      | 20   | 6    | 14   | 0    | M    | 3    | 0.27 |      |
| Inadequate experience in PPPs                                               |  |  |  |   |   |   |   | M |   | H | H |   | M | M |   | M |   |   |   |   |   |   |   |   |   |   | L |   |   |   |   |   |  |   |   |   |   |   |   |   |   |   |      |      |      |    |   |    | 5    | 1    | 4    | 0    | M    | 3    | 0.07 |      |      |
| Liabilities and disputes                                                    |  |  |  |   |   |   | H |   |   |   | M |   | L | M |   |   |   |   |   |   |   |   |   |   |   |   |   |   |   |   |   |   |  |   |   |   |   |   |   |   |   |   |      |      |      |    |   |    |      | L    | 10   | 3    | 6    | 1    | M    | 3    | 0.14 |

[illegible]

[illegible]
